# Supplementary material
Source: MDPI journal article supplement (https://www.mdpi.com/2311-5637/6/3/69)

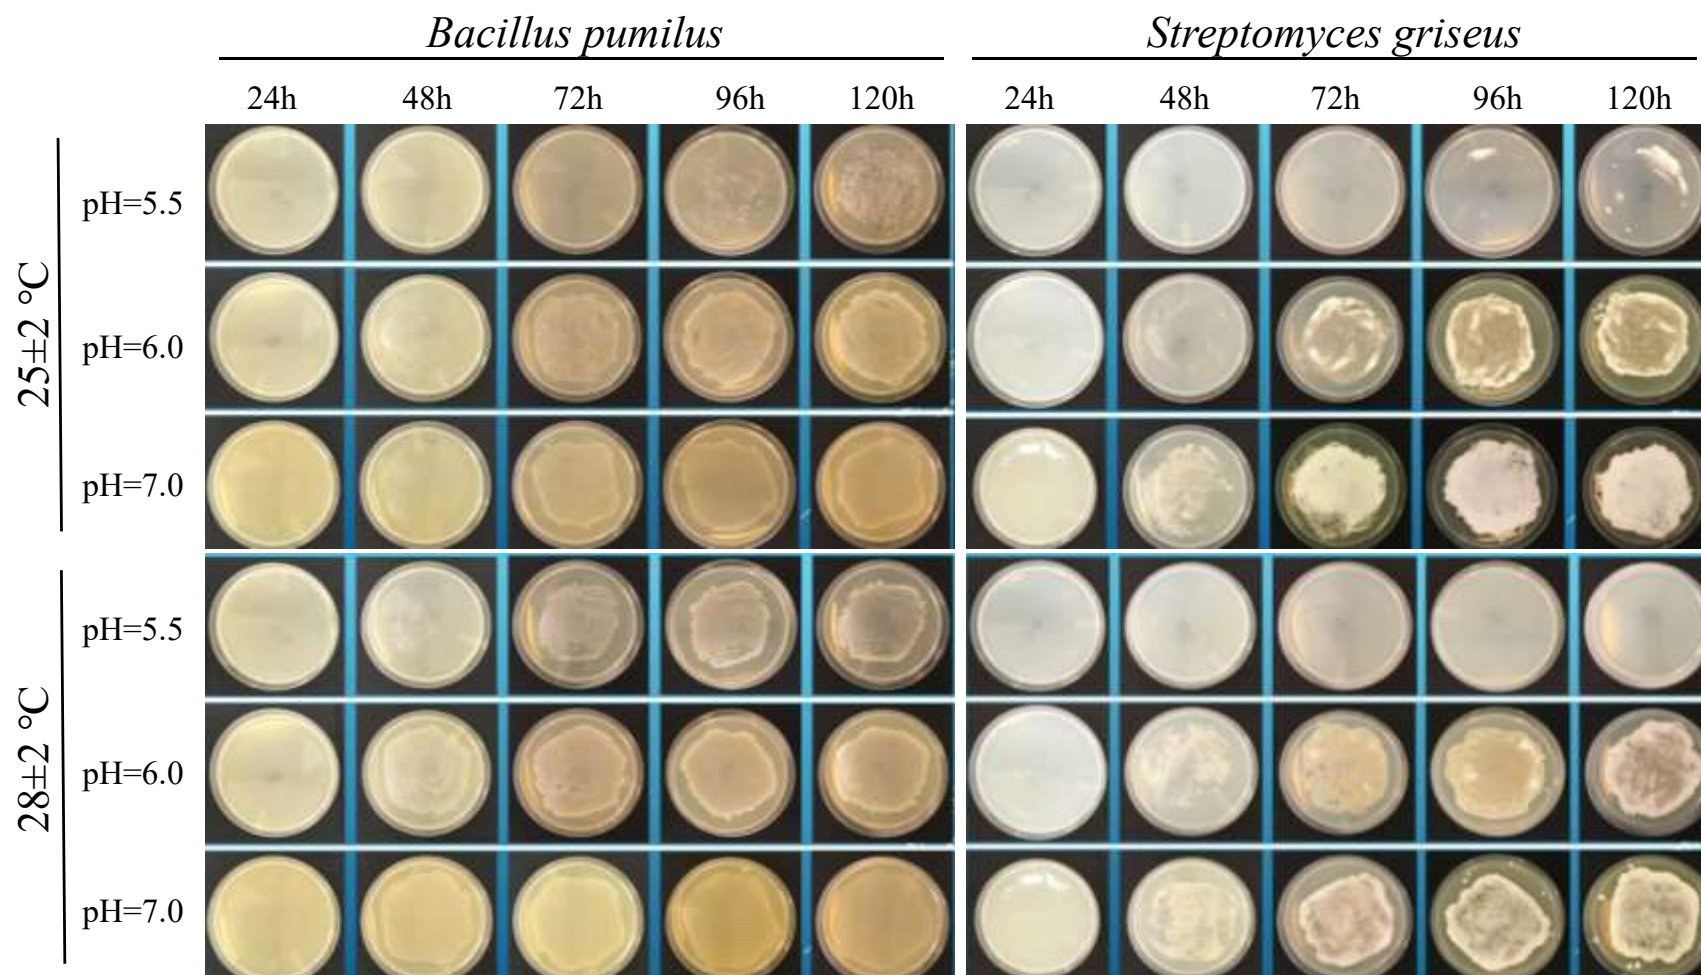

**Figure S1.** Optimizing growth conditions of *B. pumilus* and *S. griseus* using agar plates.

Supplement: s1 [file s1]
